# Supplementary material
Source: Royal Society of Chemistry journal article supplement (doi:10.1039/d6gc01943a)
Supplement: d6gc01943a1.pdf [file d6gc01943a1.pdf]

*Supplementary Information for*

**Deep Eutectic Solvent-Mediated Medical Dressings: The Evolution from Green Processing Solvents to Multifunctional Integrated Media**

Zexin Lin, Caiyue Le, Zhixia Li, Dan Kong, Yani Guo, Yimin Sun\*

Hubei Key Laboratory of Plasma Chemistry and Advanced Materials, School of Materials Science and Engineering, Wuhan Institute of Technology, Wuhan, 430205, China

**Table S1** Summary of preparation processes for DES-based medical dressings and hydrogels via hydrogen bonding and supramolecular interactions.

| Entry | Year       | First Author   | Brief description of preparation                                                                                                                                                                                          |
|-------|------------|----------------|---------------------------------------------------------------------------------------------------------------------------------------------------------------------------------------------------------------------------|
| 1     | 2020.12.10 | Qingmiao Zhang | PVA, drug components, and a choline chloride/mannose NADES were electrospun and vacuum-dried to form solid dressings via hydrogen-bonded entanglement.                                                                    |
| 2     | 2023.2.15  | Xiangyu Sun    | Chitosan heated in a lactic acid/choline chloride NADES was hydrated and vacuum-dried to form a biofilm via supramolecular hydrogen bonding.                                                                              |
| 3     | 2023.10.20 | Xiangyu Sun    | Similar to the above process, chitosan heated in a lactic acid/choline chloride DES was hydrated and vacuum-dried to form a supramolecular hydrogen-bonded biofilm.                                                       |
| 4     | 2024.2.26  | Z. L. Shaw     | A hydrated cellulose pellicle was mixed with a choline chloride/glycerol DES and antimicrobial agents, then freeze-dried to form a eutectogel via hydrogen bonding.                                                       |
| 5     | 2025.1.20  | Bin Li         | Resveratrol and chitosan were dissolved in a hydrated supramolecular HP- $\beta$ -CD/levulinic acid DES and crosslinked overnight via supramolecular interactions.                                                        |
| 6     | 2025.6.16  | Jia-Yu Yang    | A precursor containing a choline chloride/ethylene glycol DES, acrylic acid monomer, and viscosity modifiers (HEC/collagen) was exposed to UV light to form an ionic gel via photo-initiated free-radical polymerization. |
| 7     | 2025.6.22  | Jos'e M. Silva | Xylan and chitosan dissolved in an aqueous choline chloride/lactic acid DES were cast and oven-dried to form films driven by hydrogen bonding and solvent evaporation.                                                    |

|   |           |                |                                                                                                                                                                  |
|---|-----------|----------------|------------------------------------------------------------------------------------------------------------------------------------------------------------------|
| 8 | 2026.3.15 | Gleb Dubinenko | A lactic acid/tetraethylammonium chloride DES was directly mixed with PVA or a PVA/PVP blend to construct eutectogels via hydrogen-bonded physical crosslinking. |
|---|-----------|----------------|------------------------------------------------------------------------------------------------------------------------------------------------------------------|

**Table S2** Summary of preparation processes for DES-based medical dressings and hydrogels crosslinked via metal-ligand coordination.

| Entry | Year       | First Author | Brief description of preparation                                                                                                                                                                  |
|-------|------------|--------------|---------------------------------------------------------------------------------------------------------------------------------------------------------------------------------------------------|
| 1     | 2024.10.25 | Ruigang Zhou | PVA, chitosan, and a natural choline chloride/ethylene glycol DES were physically crosslinked in a one-pot method driven by metal-polyphenol (CuTA) coordination.                                 |
| 2     | 2025.1.14  | Ruigang Zhou | Chitosan, PVA, and a choline chloride/ethylene glycol DES containing microwave-extracted <i>Moringa</i> were mixed in one step to form a hydrogel driven by metal-polyphenol (CuTA) coordination. |

**Table S3** Summary of preparation processes for DES-based medical dressings and hydrogels via ionic crosslinking.

| Entry | Year      | First Author              | Brief description of preparation                                                                                                                                                                                                |
|-------|-----------|---------------------------|---------------------------------------------------------------------------------------------------------------------------------------------------------------------------------------------------------------------------------|
| 1     | 2024.1.26 | Budiono Ujaya Putra       | Cellulose nanofibers pretreated with ethylene glycol/citric acid and choline chloride/urea DESs were mixed with chloramphenicol and sodium alginate, cast, and immersed in a CaCl <sub>2</sub> solution for ionic crosslinking. |
| 2     | 2025.6.25 | Mohammad Hashem Hashempur | Chitosan, gallic acid-grafted gelatin (GGA), and <i>Nigella sativa</i> extracted via an ammonium acetate/lactic acid DES were mixed and dried at room temperature to form a xerogel film via hydrogen bonding.                  |

**Table S4** Summary of preparation processes for DES-based medical dressings and hydrogels fabricated via photo-initiated polymerization.

| Entry | Year       | First Author    | Brief description of preparation                                                                                                                                                                                                  |
|-------|------------|-----------------|-----------------------------------------------------------------------------------------------------------------------------------------------------------------------------------------------------------------------------------|
| 1     | 2024.2.11  | Xiangzhen Meng  | A lignocellulosic porous skeleton was immersed in a polymerizable acrylic acid/choline chloride DES and solidified via UV photo-initiated polymerization.                                                                         |
| 2     | 2024.8.9   | Lingzhuang Meng | HEAA monomer and a photoinitiator were dissolved in a ternary choline chloride/glycerol/zinc chloride DES and solidified in a mold via UV photo-initiated free-radical polymerization.                                            |
| 3     | 2024.10.21 | Gorawit Yusakul | An emulgel containing a hydrophobic acetic acid/menthol DES (loaded with extracts) and GelMA was shaped via 3D bioprinting and fully crosslinked via visible-light photo-polymerization.                                          |
| 4     | 2024.12.24 | Shuai Liu       | Quaternized chitosan and an acrylic acid/AMPS DES were mixed with acrylamide and cured via UV photo-initiated polymerization to form a polyelectroactive eutectogel.                                                              |
| 5     | 2025.3.22  | Huan Liu        | An ink containing a polymerizable VP/IA/NIPAM DES, MXene, and mangiferin was formed into microneedle arrays via DLP 3D printing and subsequent UV photo-initiated crosslinking.                                                   |
| 6     | 2025.5.15  | Jia-Yu Yang     | A precursor of a choline chloride/ethylene glycol DES, HEAA monomer, and ZnCl <sub>2</sub> was exposed to UV light to solidify via photo-initiated free-radical polymerization.                                                   |
| 7     | 2025.7.15  | Zijie Wang      | A crosslinked carboxymethyl cellulose hydrogel was sequentially dehydrated in ethanol and soaked in a choline chloride/glycerol DES to form a smart eutectogel via solvent exchange.                                              |
| 8     | 2025.7.24  | Ruigang Zhou    | A sodium alginate solution and a CaCl <sub>2</sub> /CuTA solution containing a choline chloride/glycerol DES were sprayed together, causing rapid gelation via simultaneous ionic crosslinking and metal-polyphenol coordination. |
| 9     | 2026.4.24  | Phuc Khanh Lam  | A polymerizable zinc chloride/NIPAM DES with ethylene glycol and lithium chloride was cast into a mold and solidified via UV photo-initiated polymerization.                                                                      |

**Table S5** Summary of preparation processes for DES-based medical dressings and eutectogels via chemical crosslinking and solvent exchange strategies.

| Entry | Year      | First Author      | Brief description of preparation                                                                                                                                                             |
|-------|-----------|-------------------|----------------------------------------------------------------------------------------------------------------------------------------------------------------------------------------------|
| 1     | 2020.12.8 | Tatum A. Bardsley | Bovine gelatin in HFIP and a choline geranate (CAGE) DES were electrospun into nanofiber scaffolds, followed by chemical crosslinking using glutaraldehyde vapor to fix the membrane.        |
| 2     | 2024.6.14 | Lei Ma            | Chitosan dissolved in a supramolecular $\beta$ -cyclodextrin/lactic acid DES underwent chemical crosslinking with genipin to form films, sponges, or gels depending on the casting method.   |
| 3     | 2025.6.23 | Hui Sun           | A polymerizable sulfobetaine methacrylate/carvacrol DES with a crosslinker and photoinitiator was exposed to UV light to solidify via photo-initiated polymerization.                        |
| 4     | 2026.1.7  | Pingping Liu      | Gelatin, polylysine, and waterborne polyurethane rapidly formed a hydrogel, which was then immersed in a choline chloride/glycerol DES to yield a composite eutectogel via solvent exchange. |

**Table S6** Summary of preparation processes for DES-based medical dressings and hydrogels constructed via dynamic covalent bonds and multi-network strategies.

| Entry | Year       | First Author      | Brief description of preparation                                                                                                                                                                                              |
|-------|------------|-------------------|-------------------------------------------------------------------------------------------------------------------------------------------------------------------------------------------------------------------------------|
| 1     | 2020.8.20  | Yilei Wang        | A choline chloride/mannose NADES was prepared. Dopamine and HEMA/DMAEMA monomers were added and left at 30°C to form a multi-network hydrogel via self-polymerization and hydrogen bonding.                                   |
| 2     | 2021.5.29  | Yilei Wang        | Sodium hyaluronate, chitosan, dopamine, and aloe vera were mixed into a choline chloride/glucose DES at 30°C, undergoing a dopamine-mediated dynamic sol-gel transition to form a hydrogel.                                   |
| 3     | 2021.9.10  | Wen Li            | Freeze-dried dopamine-conjugated hyaluronic acid (DASH) was immersed in a choline chloride/glucose DES for a dynamic sol-gel transition, followed by <i>in situ</i> reduction of silver nanoparticles.                        |
| 4     | 2023.11.22 | Yu Tian           | A polymerizable acrylamide/choline chloride/glycerol DES and thiolated hyaluronic acid were heated with initiators to form a double-network eutectogel via simultaneous polymerization and crosslinking.                      |
| 5     | 2023.12.12 | Ting Huang        | Sodium hyaluronate, botanical extracts, and polydopamine were mixed into a glucose/choline chloride DES, rapidly forming a hydrogel via a polydopamine-mediated dynamic sol-gel transition.                                   |
| 6     | 2024.11.6  | Shaghayegh Vakili | A host-guest complex of dopamine-grafted gelatin and polycyclodextrin was mixed with oxidized sodium alginate and a polymerizable DADMAC/glycerol DES, followed by heating to form a supramolecular multi-network eutectogel. |
| 7     | 2024.12.17 | Chen Chen         | A PVA solution containing a bioactive rosmarinic acid/proanthocyanidins/ethylene glycol DES and a xylitol/borax solution were mixed to form a sprayable hydrogel via rapid dynamic covalent crosslinking.                     |

**Table S7** Summary of Hydrogen Bond Acceptor (HBA) and Hydrogen Bond Donor (HBD) Constituents of Deep Eutectic Solvents in Representative Literature.

| <b>Entry</b> | <b>Year</b> | <b>First Author</b>   | <b>Hydrogen Bond Acceptor (HBA)</b> | <b>Hydrogen Bond Donor (HBD)</b> |
|--------------|-------------|-----------------------|-------------------------------------|----------------------------------|
| 1            | 2013.6.28   | Sara García-Argüelles | choline chloride                    | 1,8-octanediol                   |
| 2            | 2019.8.26   | Joana M. Silva        | menthol                             | saturated fatty                  |
| 3            | 2020.8.20   | Yilei Wang            | choline chloride                    | mannose                          |
| 4            | 2020.12.8   | Tatum A. Bardsley     | choline bicarbonate                 | geranic acid                     |
| 5            | 2020.12.10  | Qingmiao Zhang        | choline chloride                    | mannose                          |
| 6            | 2021.5.29   | Yilei Wang            | choline chloride                    | glucose                          |
| 7            | 2021.9.10   | Wen Li                | choline chloride                    | glucose                          |
| 8            | 2022.9.4    | Xin-Yao Ye            | chlorocholine chloride              | urea                             |
| 9            | 2023.2.15   | Xiangyu Sun           | choline chloride                    | L-lactic acid                    |
| 10           | 2023.2.22   | Bayan Alkhawaja       | choline chloride                    | malonic acid                     |
| 11           | 2023.10.20  | Xiangyu Sun           | glycerol                            | L-lactic acid                    |
| 12           | 2023.11.22  | Yu Tian               | choline chloride and Bet            | AM, glycerol                     |
| 13           | 2023.12.12  | Ting Huang            | choline chloride                    | glucose                          |
| 14           | 2023.12.30  | Manman Zheng          | choline chloride                    | oxalic acid                      |
| 15           | 2024.1.23   | Guangrui Ma           | choline chloride                    | chloroacetic acid and urea       |
| 16           | 2024.1.26   | Budiono Ujaya Putra   | choline chloride                    | urea                             |
| 17           | 2024.2.11   | Xiangzhen Meng        | choline chloride                    | Acrylic acid                     |

|    |            |                           |                                     |                            |
|----|------------|---------------------------|-------------------------------------|----------------------------|
| 18 | 2024.2.26  | Z. L. Shaw                | choline chloride                    | glycerol                   |
| 19 | 2024.6.14  | Lei Ma                    | $\beta$ -CD( $\beta$ -cyclodextrin) | L-lactic acid              |
| 20 | 2024.8.9   | Lingzhuang Meng           | choline chloride                    | glycerol and zinc chloride |
| 21 | 2024.10.21 | Gorawit Yusakul           | L-menthol                           | acetic acid                |
| 22 | 2024.10.25 | Ruigang Zhou              | choline chloride                    | ethylene glycol            |
| 23 | 2024.11.6  | Shaghayegh Vakili         | DADMAC                              | glycerol                   |
| 24 | 2024.12.17 | Chen Chen                 | RA and PC                           | ethylene glycol            |
| 25 | 2024.12.24 | Shuai Liu                 | QCS                                 | Aac and AMPS               |
| 26 | 2025.1.14  | Ruigang Zhou              | choline chloride                    | ethylene glycol            |
| 27 | 2025.1.20  | Bin Li                    | HP- $\beta$ -CD                     | Lev                        |
| 28 | 2025.3.22  | Huan Liu                  | VP                                  | IA                         |
| 29 | 2025.5.15  | Jia-Yu Yang               | choline chloride                    | ethylene glycol            |
| 30 | 2025.6.22  | José M. Silva             | choline chloride                    | lactic acid                |
| 31 | 2025.6.25  | Mohammad Hashem Hashempur | Acrylic acid                        | L-lactic acid              |
| 32 | 2025.7.15  | Zijie Wang                | choline chloride                    | glycerol                   |
| 33 | 2025.7.24  | Ruigang Zhou              | choline chloride                    | glycerol                   |
| 34 | 2026.1.7   | Pingping Liu              | choline chloride                    | glycerol                   |
| 35 | 2026.3.15  | Gleb Dubinenko            | Tetraethylammonium chloride         | L-Lactic acid              |
| 36 | 2026.4.24  | Phuc Khanh Lam            | Zinc chloride                       | N-isopropylacrylamide      |

---

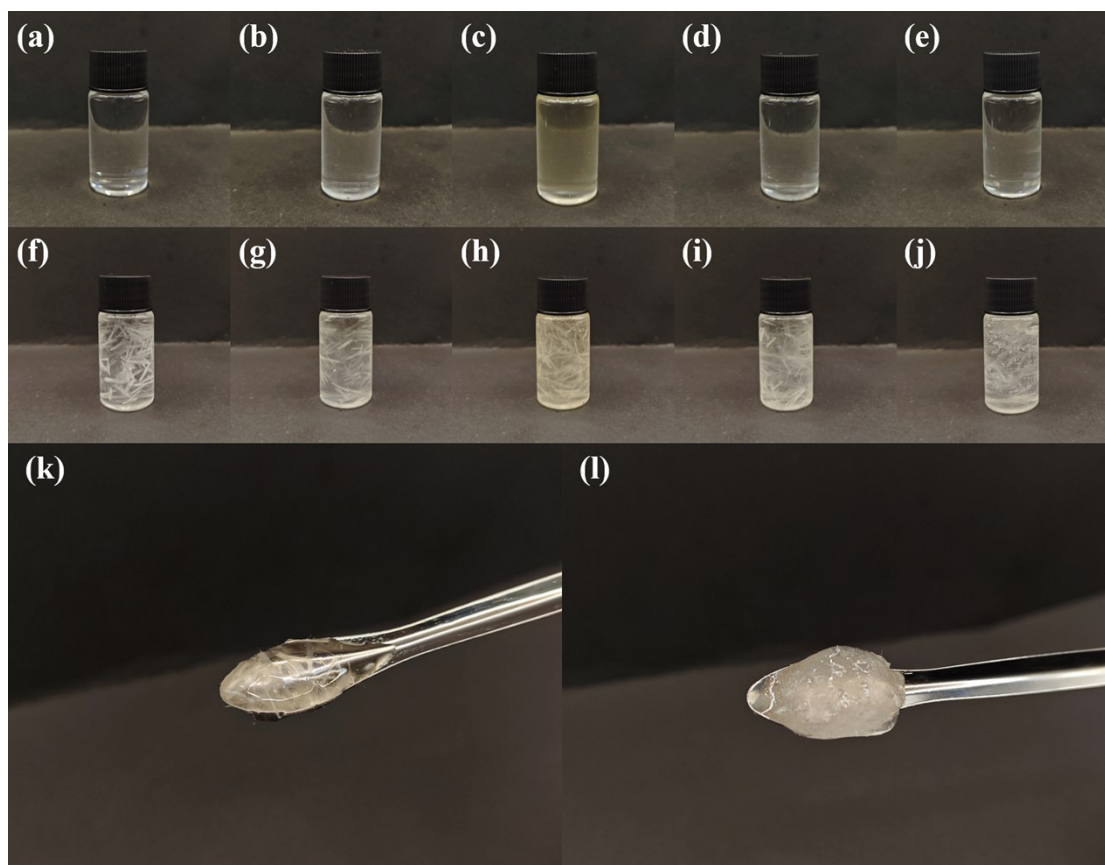

**Fig. S1** Dissolution behavior and macroscopic viscous states of Lyocell fibers in distinct Deep Eutectic Solvent (DES) systems: (a–e) Optical images of pure solvent systems at 25 °C: (a) Pure glycerol (Control); (b) ChCl:Urea (1:2); (c) Betaine:Glycerol (1:2); (d) ChCl:Chloroacetic acid (1:2); and (e) ChCl:Citric acid (2:1). (f–j) Macroscopic dissolution states of 0.10 g Lyocell fibers in the corresponding solvents (a–e). (k, l) Magnified optical close-ups of representative systems: (k) The glycerol group (corresponding to f) displaying intact fiber bundles without swelling; (l) The ChCl:Citric acid group (corresponding to j) exhibiting significant swelling and transition to a transparent gel-like state, indicating macroscopic structural disintegration.
